# Supplementary material for: Digital pathology-aided assessment of tumor-infiltrating T lymphocytes in advanced stage, HPV-negative head and neck tumors
Source: Springer Nature journal article supplement (doi:10.1007/s00262-020-02481-3), 2020-01-24
Supplement: MOESM1 [file 17609168]

## SUPPLEMENTARY FIGURE 1

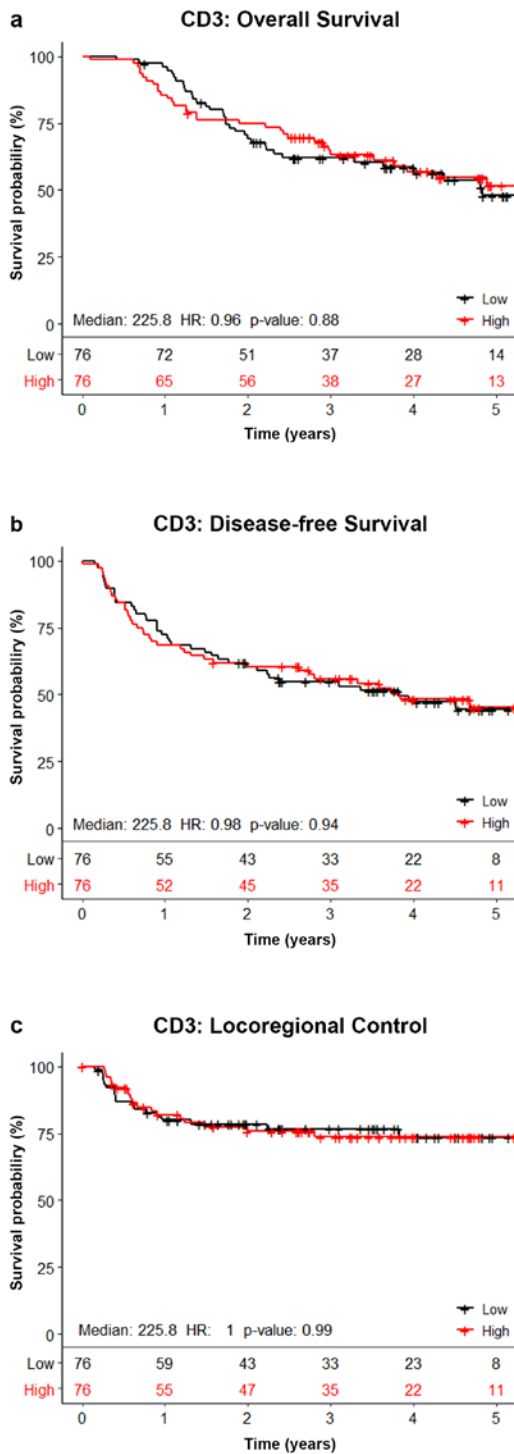

**Supplementary figure 1: Association between the number of CD3+ TILs and clinical outcome.** Kaplan-Meier curves visualizing the association between the number of CD3+ TILs in the tumor epithelium and OS (a), DFS (b), and LRC (c). The median number of CD3+ TILs was used as cut-off for the survival analysis. No association was found between the number of CD3+ TILs and OS, DFS, or LRC.

## SUPPLEMENTARY FIGURE 2

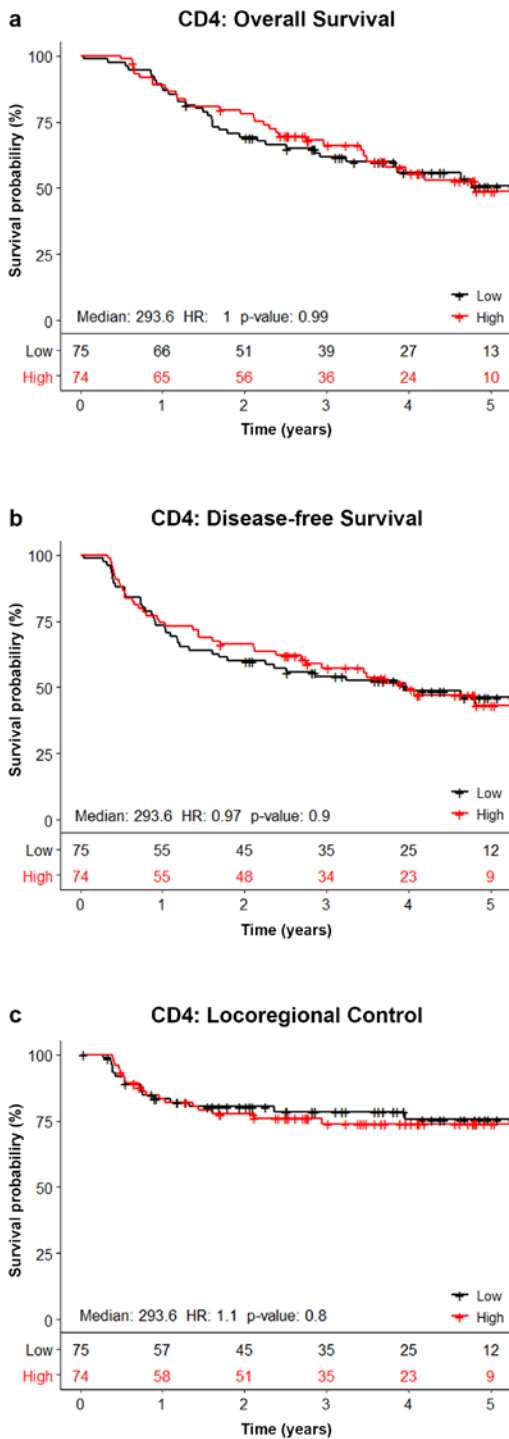

**Supplementary figure 2: Association between the number of CD4+ TILs and clinical outcome.** Kaplan-Meier curves visualizing the association between the number of CD4+ TILs in the tumor epithelium and OS (a), DFS (b), and LRC (c). The median number of CD4+ TILs was used as cut-off for the survival analysis. No association was found between the number of CD4+ TILs and OS, DFS, or LRC.

### SUPPLEMENTARY FIGURE 3

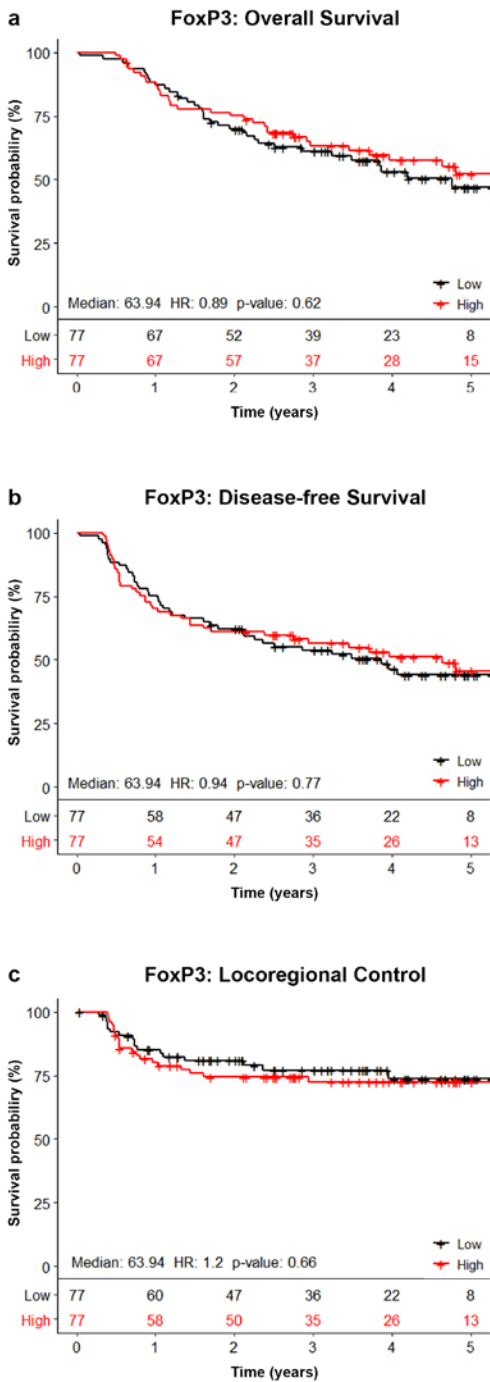

**Supplementary figure 3: Association between the number of FoxP3+ TILs and clinical outcome.** Kaplan-Meier curves visualizing the association between the number of FoxP3+ TILs in the tumor epithelium and OS (a), DFS (b), and LRC (c). The median number of FoxP3+ TILs was used as cut-off for the survival analysis. No association was found between the number of FoxP3+ TILs and OS, DFS, or LRC.

## SUPPLEMENTARY FIGURE 4

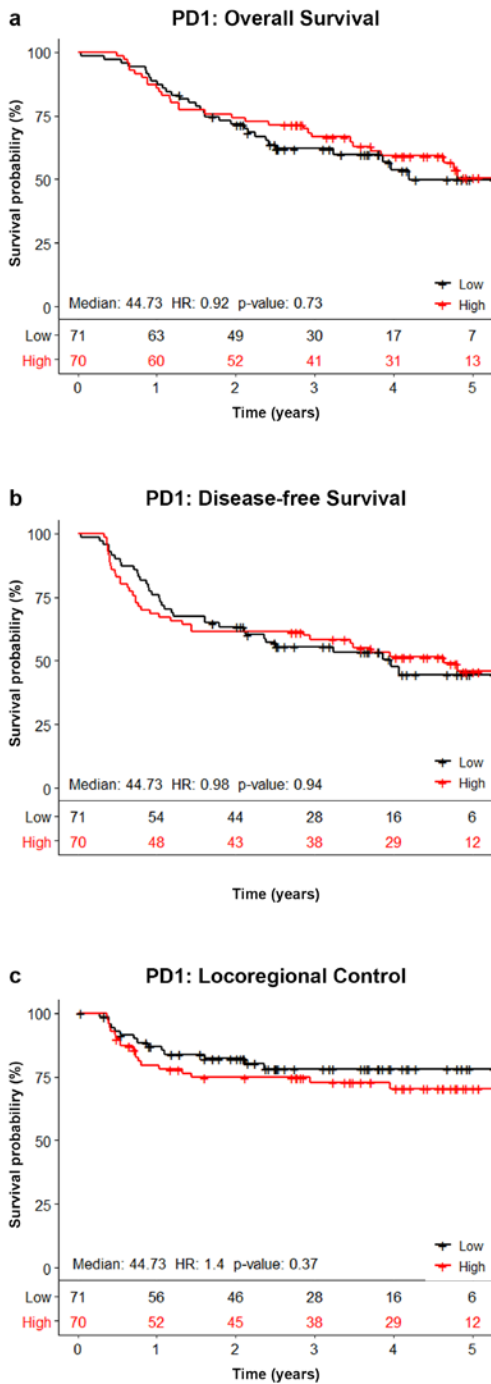

**Supplementary figure 4: Association between the number of PD-1+ TILs and clinical outcome.** Kaplan-Meier curves visualizing the association between the number of PD1+ TILs in the tumor epithelium and OS (a), DFS (b), and LRC (c). The median number of PD1+ TILs was used as cut-off for the survival analysis. No association was found between the number of PD1+ TILs and OS, DFS, or LRC.

## SUPPLEMENTARY FIGURE 5

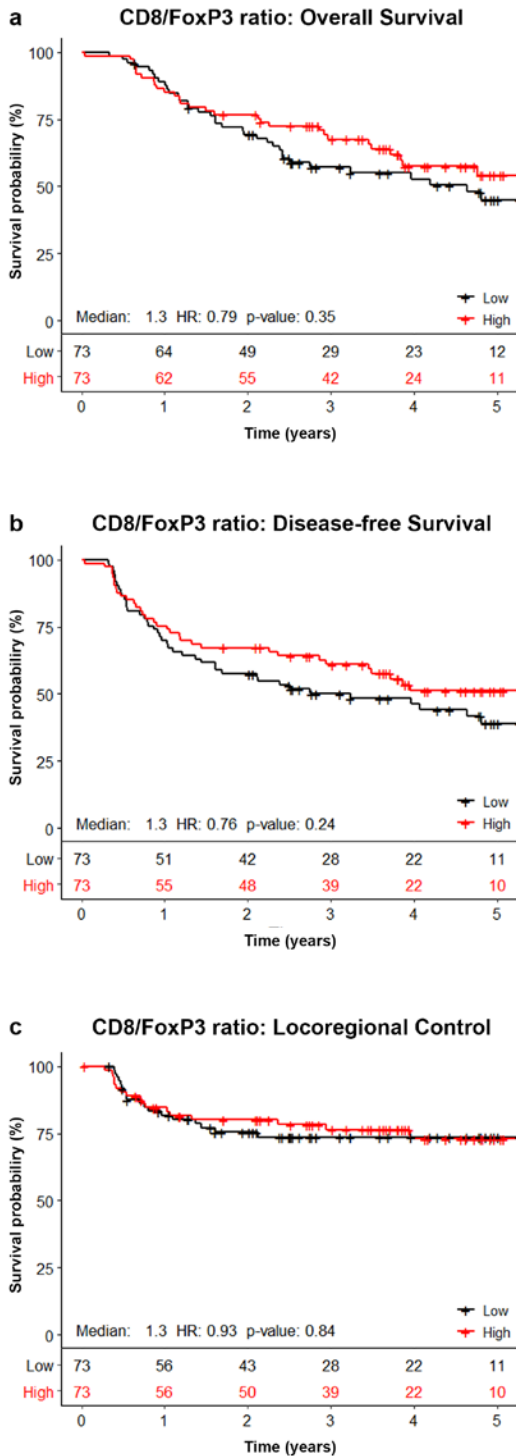

**Supplementary figure 5: Association between the number of CD8/FoxP3 ratio and clinical outcome.** Kaplan-Meier curves visualizing the association between the number of the CD8/FoxP3 ratio in the tumor epithelium and OS (a), DFS (b), and LRC (c). The median number of the CD8/FoxP3 ratio was used as cut-off for the survival analysis. No association was found between the number of the CD8/FoxP3 ratio and OS, DFS, or LRC.

SUPPLEMENTARY TABLE 1

|                        | Median<br>[TILs/mm <sup>2</sup> ] | Interquartile range | Median<br>log <sub>2</sub> (TILcount) | Interquartile range<br>log <sub>2</sub> (TILcount) |
|------------------------|-----------------------------------|---------------------|---------------------------------------|----------------------------------------------------|
| <b>CD3</b>             | 217                               | [115 – 455]         | 7.82                                  | [6.86 – 8.84]                                      |
| <b>CD4</b>             | 261                               | [153 – 476]         | 8.20                                  | [7.35 – 8.92]                                      |
| <b>CD8</b>             | 83                                | [33 – 230]          | 6.46                                  | [5.15 – 7.81]                                      |
| <b>FoxP3</b>           | 63                                | [36 – 129]          | 6.02                                  | [5.20 – 7.21]                                      |
| <b>PD-1</b>            | 41                                | [16 – 107]          | 5.52                                  | [4.21 – 6.77]                                      |
| <b>CD8/FoxP3 ratio</b> | 1.32                              | [0.55 – 2.98]       | 0.38                                  | [-0.89 – 1.32]                                     |

**Supplementary Table 1:** Median values and interquartile ranges of TIL counts (TILs/mm<sup>2</sup>) and the log<sub>2</sub> of TIL counts..

## SUPPLEMENTARY TABLE 2

| Marker | ICC (95% CI)        |
|--------|---------------------|
| CD3    | 0.990 (0.971-0.996) |
| CD4    | 0.986 (0.975-0.992) |
| CD8    | 0.998 (0.997-0.999) |
| FoxP3  | 0.903 (0.794-0.950) |
| PD1    | 0.949 (0.856-0.977) |

**Supplementary Table 2: Inter observer analysis.**  
Intraclass correlation coefficients were calculated based on a mean-rating ( $k = 2$ ), absolute-agreement, 2-way mixed-effects model.

SUPPLEMENTARY TABLE 3

|                       | CD3           | p            | CD4           | p            | CD8          | p            | FoxP3       | p    | PD1         | p            |
|-----------------------|---------------|--------------|---------------|--------------|--------------|--------------|-------------|------|-------------|--------------|
| <b>Age</b>            | r = 0.00      | 0.99         | r = 0.04      | 0.64         | r = 0.00     | 0.98         | r = 0.07    | 0.39 | r = 0.02    | 0.80         |
| <b>Sex</b>            |               |              |               |              |              |              |             |      |             |              |
| Male                  | 229 [125-453] | 0.78         | 311 [173-490] | 0.62         | 100 [43-226] | 0.11         | 59 [36-125] | 0.47 | 49 [19-128] | 0.093        |
| Female                | 208 [110-484] |              | 263 [157-448] |              | 65 [27-196]  |              | 77 [36-176] |      | 26 [15-103] |              |
| <b>ACE-27</b>         |               |              |               |              |              |              |             |      |             |              |
| None/mild             | 231 [118-473] | 0.23         | 309 [169-485] | 0.35         | 98 [42-230]  | 0.14         | 68 [36-166] | 0.62 | 50 [19-121] | <b>0.012</b> |
| Moderate/severe       | 209 [107-307] |              | 248 [125-483] |              | 60 [29-179]  |              | 61 [39-113] |      | 19 [12-44]  |              |
| <b>WHO</b>            |               |              |               |              |              |              |             |      |             |              |
| <2                    | 339 [112-579] | 0.71         | 366 [222-509] | 0.48         | 97 [39-221]  | 0.52         | 89 [38-166] | 0.78 | 53 [15-102] | 0.82         |
| ≥2                    | 224 [129-490] |              | 297 [171-491] |              | 99 [43-282]  |              | 66 [39-173] |      | 40 [18-122] |              |
| <b>Tumor location</b> |               |              |               |              |              |              |             |      |             |              |
| Oropharynx            | 200 [118-386] | 0.72         | 293 [163-467] | 0.87         | 65 [35-194]  | 0.30         | 62 [31-116] | 0.36 | 37 [17-93]  | 0.48         |
| Hypopharynx           | 292 [109-557] |              | 316 [215-481] |              | 109 [37-225] |              | 75 [41-221] |      | 57 [15-121] |              |
| Larynx                | 256 [125-453] |              | 264 [123-497] |              | 125 [43-327] |              | 62 [43-130] |      | 51 [20-107] |              |
| <b>T stage</b>        |               |              |               |              |              |              |             |      |             |              |
| T1-3                  | 278 [132-496] | 0.12         | 318 [178-495] | 0.20         | 97 [33-229]  | 0.95         | 69 [39-142] | 0.29 | 45 [17-107] | 0.99         |
| T4                    | 194 [112-384] |              | 280 [142-446] |              | 80 [43-211]  |              | 54 [32-165] |      | 45 [18-120] |              |
| <b>N stage</b>        |               |              |               |              |              |              |             |      |             |              |
| N0-1                  | 279 [112-588] | 0.54         | 301 [157-468] | 0.84         | 104 [52-298] | 0.23         | 63 [34-149] | 0.92 | 40 [12-129] | 0.72         |
| N2-3                  | 210 [118-453] |              | 294 [171-504] |              | 80 [35-209]  |              | 64 [36-145] |      | 45 [19-106] |              |
| <b>PD-L1</b>          |               |              |               |              |              |              |             |      |             |              |
| <5%                   | 216 [115-392] | <b>0.047</b> | 280 [157-425] | <b>0.021</b> | 76 [42-386]  | <b>0.038</b> | 62 [36-121] | 0.19 | 38 [15-91]  | <b>0.014</b> |
| ≥5%                   | 366 [121-797] |              | 423 [173-705] |              | 172 [42-386] |              | 74 [36-237] |      | 68 [26-132] |              |

**Supplementary Table 3:** Correlations between TILs and clinicopathological characteristics. The correlation between T cell markers and age was assessed using Spearman correlation (Spearman's r and p-value in table), the correlation between T cell markers and tumor location was assessed using Kruskal-Wallis test (median, interquartile ranges and p-value in table), all other correlations were calculated using Mann-Whitney U tests (median, interquartile ranges and p-values in table).
